# Supplementary material
Source: PubMed Central journal article supplement (PMC9246473)
Supplement: mmc1.pdf [file mmc1.pdf]

# THE LANCET

## Supplementary appendix

This appendix formed part of the original submission. We post it as supplied by the authors.

Supplement to: Wolter N, Jassat W, DATCOV-Gen author group, et al. Clinical severity of omicron lineage BA.2 compared with BA.1 in South Africa. *Lancet* 2022; published online June 30. [https://doi.org/10.1016/S0140-6736\(22\)00981-3](https://doi.org/10.1016/S0140-6736(22)00981-3).

## Supplementary material

**Supplementary table 1.** Multivariable logistic regression analysis evaluating the association between S-gene positive infection, compared to S-gene target failure (SGTF) infection, and hospitalisation, South Africa, 1 December 2021 – 20 January 2022<sup>a</sup> (N=92,962)

|                               | Hospital admission <sup>b</sup><br>n/N (%) | Adjusted odds ratio<br>(95% CI) |
|-------------------------------|--------------------------------------------|---------------------------------|
| <b>SARS-CoV-2 sub-lineage</b> | N=95,470                                   |                                 |
| SGTF (BA.1 proxy)             | 2,965/87,194 (3.4)                         | Ref                             |
| S-gene positive (BA.2 proxy)  | 295/8,276 (3.6)                            | 0.96 (0.85-1.09)                |
| <b>Age group (years)</b>      | N=95,470                                   |                                 |
| <5                            | 226/1,681 (13.4)                           | <b>7.49 (6.02-9.32)</b>         |
| 5-12                          | 98/4,426 (2.2)                             | 1.16 (0.89-1.50)                |
| 13-18                         | 109/5,278 (2.1)                            | 1.06 (0.83-1.37)                |
| 19-24                         | 146/7,127 (2.1)                            | Ref                             |
| 25-39                         | 855/35,551 (2.4)                           | 1.19 (0.99-1.42)                |
| 40-59                         | 847/30,953 (2.7)                           | <b>1.39 (1.16-1.66)</b>         |
| ≥60                           | 979/10,454 (9.4)                           | <b>4.97 (4.12-5.94)</b>         |
| <b>Sex</b>                    | N=94,564                                   |                                 |
| Male                          | 1,364/42,017 (3.3)                         | Ref                             |
| Female                        | 1,884/52,547 (3.6)                         | <b>1.14 (1.06-1.22)</b>         |
| <b>Province</b>               | N=93,849                                   |                                 |
| Eastern Cape                  | 3/100 (3.0)                                | 1.35 (0.42-4.35)                |
| Free State                    | 78/2,126 (3.7)                             | <b>1.35 (1.01-1.82)</b>         |

|                                 |                    |                         |
|---------------------------------|--------------------|-------------------------|
| Gauteng                         | 1,517/51,745 (2.9) | <b>1.38 (1.14-1.66)</b> |
| KwaZulu-Natal                   | 1,026/20,615 (5.0) | <b>2.16 (1.78-2.62)</b> |
| Limpopo                         | 77/3,688 (2.1)     | 1.17 (0.88-1.57)        |
| Mpumalanga                      | 179/4,559 (3.9)    | <b>2.13 (1.68-2.70)</b> |
| North West                      | 156/4,272 (3.7)    | <b>1.95 (1.53-2.49)</b> |
| Northern Cape                   | 33/1,203 (2.7)     | 0.97 (0.65-1.44)        |
| Western Cape                    | 122/5,541 (2.2)    | Ref                     |
| <b>Healthcare sector</b>        | <b>N=95,470</b>    |                         |
| Public                          | 1,049/23,498 (4.5) | Ref                     |
| Private                         | 2,211/71,972 (3.1) | <b>0.63 (0.58-0.68)</b> |
| <b>Re-infection<sup>c</sup></b> | <b>N=95,470</b>    |                         |
| No                              | 3,016/86,086 (3.5) | Ref                     |
| Yes                             | 244/9,384 (2.6)    | 0.99 (0.86-1.14)        |

<sup>a</sup> Cases followed-up for hospital admission until 10 February 2022

<sup>b</sup> Admission to hospital between 7 days prior to 21 days after diagnosis (specimen collection date)

<sup>c</sup> Re-infection was defined as an individual with at least one positive SARS-CoV-2 test >90 days prior to the current episode

**Supplementary table 2.** Multivariable logistic regression analysis evaluating the association between S gene positive infection, compared to S-gene target failure (SGTF) infection, and severe disease among hospitalised individuals with known outcome, South Africa, 1 December 2021 – 20 January 2022<sup>a</sup> (N=2,984)

|                                       | Severe disease <sup>a</sup><br>n/N (%) | Adjusted odds ratio<br>(95% CI) |
|---------------------------------------|----------------------------------------|---------------------------------|
| <b>SARS-CoV-2 sub-lineage</b> N=3,058 |                                        |                                 |
| SGTF (BA.1 proxy)                     | 929/2776 (33.5)                        | Ref                             |
| S-gene positive<br>(BA.2 proxy)       | 86/282 (30.5)                          | 0.91 (0.68-1.22)                |
| <b>Age group (years)</b> N=3,058      |                                        |                                 |
| <5                                    | 37/216 (17.1)                          | 0.79 (0.45-1.39)                |
| 5-12                                  | 8/92 (8.7)                             | <b>0.38 (0.16-0.90)</b>         |
| 13-18                                 | 18/103 (17.5)                          | 0.80 (0.41-1.57)                |
| 19-24                                 | 28/139 (20.1)                          | Ref                             |
| 25-39                                 | 135/804 (16.8)                         | 0.83 (0.52-1.33)                |
| 40-59                                 | 284/790 (36.0)                         | <b>2.09 (1.33-3.31)</b>         |
| ≥60                                   | 505/914 (55.3)                         | <b>4.36 (2.77-6.85)</b>         |
| <b>Sex</b> N=3,046                    |                                        |                                 |
| Male                                  | 473/1,275 (37.1)                       | Ref                             |
| Female                                | 536/1,771 (30.3)                       | <b>0.83 (0.70-0.98)</b>         |
| <b>Province</b> N=2,994               |                                        |                                 |
| Eastern Cape                          | 1/3 (33.3)                             | 2.21 (0.16-31.1)                |
| Free State                            | 28/70 (40.0)                           | <b>2.44 (1.19-5.02)</b>         |
| Gauteng                               | 509/1,384 (36.8)                       | <b>2.79 (1.72-4.55)</b>         |
| KwaZulu-Natal                         | 297/996 (29.8)                         | <b>1.78 (1.08-2.94)</b>         |
| Limpopo                               | 10/76 (13.2)                           | 0.81 (0.34-1.89)                |

|                                             |                           |                  |                           |
|---------------------------------------------|---------------------------|------------------|---------------------------|
|                                             | Mpumalanga                | 56/173 (32.4)    | <b>2.07 (1.13-3.77)</b>   |
|                                             | North West                | 33/144 (22.9)    | 1.56 (0.83-2.95)          |
|                                             | Northern Cape             | 26/31 (83.9)     | <b>12.43 (4.10-37.63)</b> |
|                                             | Western Cape              | 27/117 (23.1)    | Ref                       |
| <b>Co-morbidity<sup>c</sup></b>             |                           | N=3,058          |                           |
|                                             | Absent                    | 636/2,244 (28.3) | Ref                       |
|                                             | Present                   | 379/814 (46.6)   | <b>1.52 (1.25-1.84)</b>   |
| <b>Healthcare sector</b>                    |                           | N=3,058          |                           |
|                                             | Public                    | 377/965 (39.1)   | Ref                       |
|                                             | Private                   | 638/2093 (30.5)  | 0.86 (0.70-1.07)          |
| <b>Days between diagnosis and admission</b> |                           | N=3,058          |                           |
|                                             | 1-7 days before diagnosis | 96/251 (38.3)    | Ref                       |
|                                             | 0-6 days after diagnosis  | 803/2,496 (32.2) | 0.82 (0.60-1.11)          |
|                                             | 7-21 days after diagnosis | 116/311 (37.3)   | 0.96 (0.65-1.41)          |
| <b>Re-infection<sup>d</sup></b>             |                           | N=3,058          |                           |
|                                             | No                        | 963/2,831 (34.0) | Ref                       |
|                                             | Yes                       | 52/227 (22.9)    | 0.77 (0.54-1.11)          |
| <b>SARS-CoV-2 vaccination<sup>e</sup></b>   |                           | N=3,058          |                           |
|                                             | No                        | 178/437 (40.7)   | Ref                       |
|                                             | Yes                       | 43/169 (25.4)    | <b>0.52 (0.33-0.82)</b>   |
|                                             | Unknown                   | 794/2,452 (32.4) | <b>0.75 (0.57-0.98)</b>   |

<sup>a</sup> Cases followed-up for in-hospital outcome until 10 February 2022

<sup>b</sup> Severe disease defined as a hospitalised patient meeting at least one of the following criteria: admitted to ICU, received oxygen treatment, ventilated, received extracorporeal membrane oxygenation (ECMO), experienced acute respiratory distress syndrome (ARDS) and/or died

<sup>c</sup> Co-morbidity defined as  $\geq 1$  of the following conditions: hypertension, diabetes, chronic cardiac disease, chronic kidney disease, asthma, chronic obstructive pulmonary disease (COPD), malignancy, HIV, and active or past tuberculosis

<sup>d</sup> Re-infection was defined as an individual with at least one positive SARS-CoV-2 test  $>90$  days prior to the current episode

<sup>e</sup> Vaccination defined as  $\geq 1$  dose of SARS-CoV-2 vaccine (Johnson & Johnson / Pfizer-BioNTech)

**Supplementary table 3.** Comparison of clinical severity components by Omicron sub-lineage, among hospitalised individuals with known outcome, South Africa, 1 December 2021 – 20 January 2022<sup>a</sup> (N=3,058)

| Severity component | Omicron sub-lineage |                              | P-value <sup>b</sup> |
|--------------------|---------------------|------------------------------|----------------------|
|                    | SGTF (BA.1 proxy)   | S-gene positive (BA.2 proxy) |                      |
|                    | n (%)               | n (%)                        |                      |
|                    | N=2776              | N=282                        |                      |
| ICU admission      | 252 (9.1)           | 26 (9.2)                     | 0.937                |
| Oxygen treatment   | 636 (22.9)          | 58 (20.6)                    | 0.371                |
| Ventilated         | 53 (1.9)            | 4 (1.4)                      | 0.562                |
| Received ECMO      | 0 (0.0)             | 0 (0.0)                      | N/A                  |
| ARDS               | 32 (1.2)            | 2 (0.7)                      | 0.499                |
| Died               | 242 (8.7)           | 20 (7.1)                     | 0.353                |

SGTF: S-gene target failure, ICU: intensive care unit, ECMO: extracorporeal membrane oxygenation, ARDS: acute respiratory distress syndrome

<sup>a</sup> Cases followed-up for in-hospital outcome until 10 February 2022

<sup>b</sup> Pearson's Chi-squared test

## **ACKNOWLEDGEMENTS**

We acknowledge all NGS-SA members and laboratory teams, laboratory teams at the Centre for Respiratory Diseases and Meningitis and the Sequencing Core Facility of the NICD (Johannesburg, South Africa) for genomic sequencing data; and the national SARS-CoV-2 NICD surveillance team and NICD Information Technology team for NMCSS case data. We thank all laboratories for submitting specimens for sequencing, all public and private laboratories for COVID-19 diagnostic test data, and all public laboratories and Lancet Laboratories for ThermoFisher TaqPath™ COVID-19 PCR data. We thank all hospitals and health-care workers submitting data through the DATCOV surveillance programme. We are grateful to Cecile Viboud and Kaiyuan Sun of the Fogarty International Center, National Institutes of Health (Bethesda, MD, USA), for their input on the analysis.

## **AUTHOR CONTRIBUTIONS**

Conception and design of study: NW, WJ, SW, AvG, CC

Data collection and laboratory processing: NW, WJ, SW, RW, HM, DGA, JE, JNB, CS, NT, NC, Mdp, NG, AI, AG, KM, WS, FKT, KS, ZM, NH, RP, JW, AvG, CC

Analysis and interpretation: NW, WJ, SW, RW, HM, MG, DGA, JE, JNB, CS, NC, Mdp, NG, AI, AG, KM, WS, FKT, ZM, NH, RP, JW, HH, MD, AB AvG, CC

Accessed and verified the underlying data: NW, RW, HM, DGA, JE, AvG

Drafted the Article: NW, AvG, CC

All authors critically reviewed the Article.



**\*DATCOV-Gen author group:** Sibongile Walaza<sup>1,4</sup>, Richard Welch<sup>3</sup>, Harry Moultrie<sup>2,5</sup>, Michelle Groome<sup>3</sup>, Daniel Gyamfi Amoako<sup>1,6</sup>, Josie Everatt<sup>1</sup>, Jinal N. Bhiman<sup>7,8</sup>, Cathrine Scheepers<sup>7,8</sup>, Naume Tebeila<sup>1</sup>, Nicola Chiwandire<sup>1</sup>, Mignon du Plessis<sup>1,2</sup>, Nevashan Govender<sup>3</sup>, Arshad Ismail<sup>9</sup>, Allison Glass<sup>10</sup>, Koleka Mlisana<sup>11,12</sup>, Wendy Stevens<sup>2,11</sup>, Florette K. Treurnicht<sup>2,11</sup>, Kathleen Subramoney<sup>2, 11</sup>, Zinhle Makatini<sup>2,11</sup>, Nei-yuan Hsiao<sup>11,13</sup>, Raveen Parboosing<sup>2,11,14</sup>, Jeannette Wadula<sup>2,11,15</sup>, Hannah Hussey<sup>16</sup>, Prof Mary-Ann Davies<sup>16</sup>, Prof Andrew Boule<sup>16</sup>

<sup>1</sup> Centre for Respiratory Diseases and Meningitis, National Institute for Communicable Diseases (NICD) of the National Health Laboratory Service, Johannesburg, South Africa

<sup>2</sup> School of Pathology, Faculty of Health Sciences, University of the Witwatersrand, Johannesburg, South Africa

<sup>3</sup> Division of Public Health Surveillance and Response, National Institute for Communicable Diseases (NICD) of the National Health Laboratory Service, Johannesburg, South Africa

<sup>4</sup> School of Public Health, Faculty of Health Sciences, University of the Witwatersrand, Johannesburg, South Africa

<sup>5</sup> Centre for Tuberculosis, National Institute for Communicable Diseases (NICD) of the National Health Laboratory Service, Johannesburg, South Africa

<sup>6</sup> School of Health Sciences, College of Health Sciences, University of KwaZulu-Natal, KwaZulu-Natal, South Africa

<sup>7</sup> Centre for HIV and STIs, National Institute for Communicable Diseases of the National Health Laboratory Service, Johannesburg, South Africa

<sup>8</sup> SA MRC Antibody Immunity Research Unit, School of Pathology, Faculty of Health Sciences, University of the Witwatersrand, Johannesburg, South Africa

<sup>9</sup> Sequencing Core Facility, National Institute for Communicable Diseases of the National Health Laboratory Service, Johannesburg, South Africa

<sup>10</sup> Lancet Laboratories, Johannesburg, South Africa

<sup>11</sup> National Health Laboratory Service (NHLS), South Africa

<sup>12</sup> School of Laboratory Medicine and Medical Sciences, University of KwaZulu Natal, Durban, South Africa

<sup>13</sup> Division of Medical Virology, University of Cape Town, Cape Town, South Africa

<sup>14</sup> Department of Virology, University of KwaZulu-Natal, Durban, South Africa

<sup>15</sup> Department of Clinical Microbiology & Infectious Diseases, CH Baragwanath Academic Hospital, Johannesburg, South Africa

<sup>16</sup> Western Cape Government: Health and School of Public Health and Family Medicine, University of Cape Town, Cape Town, South Africa
